# Supplementary material
Source: Springer Nature journal article supplement (https://www.springermedizin.de/resource/supplementary/12911_2006_129_MOESM1_ESM.pdf/9527190)

Real Data

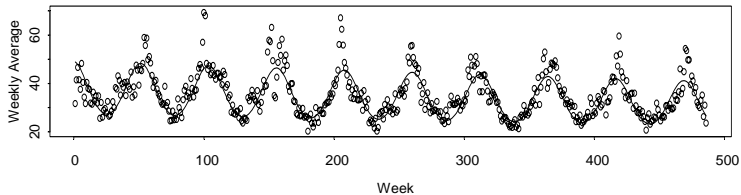

Simulated Data from Nonhierarchical Model

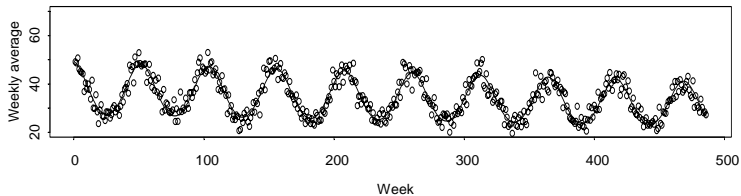

Simulated Data from Hierarchical Model

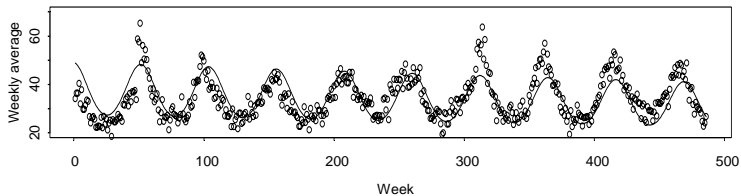

Supplement: MOESM1 [file 9527190]
